# Supplementary material for: Renal proximal tubular NEMO plays a critical role in ischemic acute kidney injury
Source: JCI journal article supplement (doi:10.1172/jci.insight.139246), 2020-09-17
Supplement: sd1 [file 1]

## Supplemental Figure

NEMO<sup>fl/fl</sup> RIR

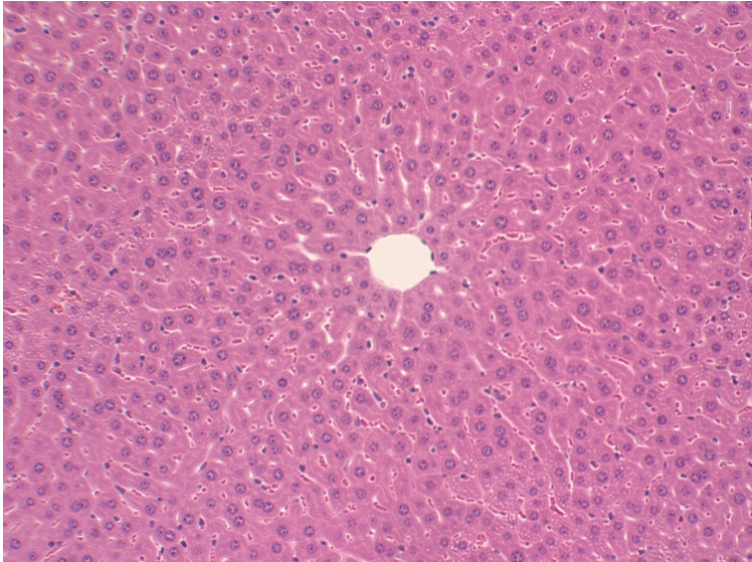

NEMO<sup>fl/fl</sup> PEPCK-Cre RIR

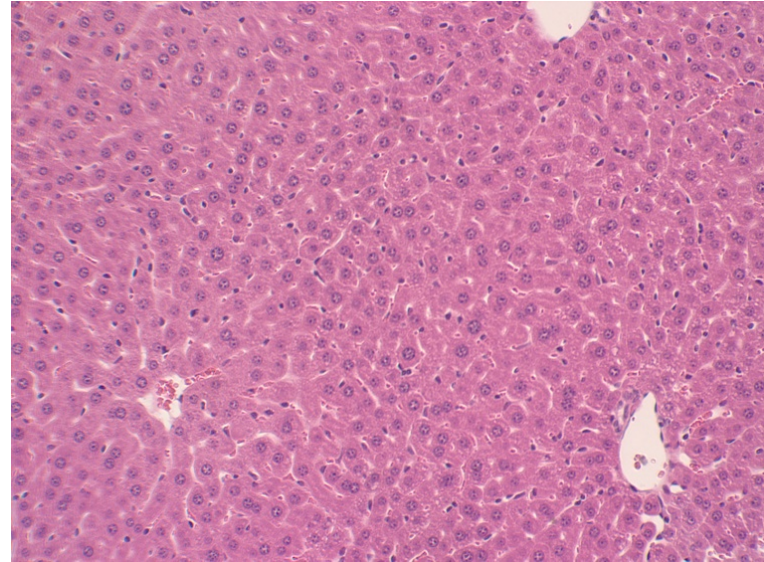

**Kidney proximal tubule NEMO deletion did not alter hepatic injury after ischemic AKI.** Representative H&E images (200X magnification) of livers of mice subjected to 30 min renal ischemia and 24 hrs reperfusion (representative of 5 experiments).
